# Supplementary material for: The Psychological Impact of Epidemic and Pandemic Outbreaks on Healthcare Workers: Rapid Review of the Evidence
Source: Springer Nature journal article supplement (doi:10.1007/s11920-020-01166-z), 2020-07-10
Supplement: 11920_2020_1166_MOESM1_ESM.docx [file 11920_2020_1166_MOESM1_ESM.docx]

APPENDIX 1

Search strategy

Search: PubMed; PsycINFO; Web of Science.

Search 1 (pandemic/endemic);

‘infect*’; ‘COVID*’, ‘SARS’; ‘influenza’; ‘flu’; ‘MERS’; ‘ebola’.

=COMBINE WITH OR

Search 2 (psychological impact);

‘Mental’; ‘Psych*’.

=COMBINE WITH OR

Search 3 (healthcare workers);

‘Health Personnel’; ‘health worker’; ‘Medical Staff’; ‘Physician’; ‘Nurses’.

=COMBINE WITH OR

Combine Search 1 AND Search 2 AND Search 3
